# Supplementary material
Source: publisher figshare collection journal article supplement (https://acs.figshare.com/ndownloader/files/25559789)
Supplement: Supplementary file 1 [file 25559789]

**Supplementary Materials for Manuscript:**

**Performance of a thermally regenerative battery with 3D  
printed Cu/C composite electrodes: Effect of electrode pore size**

Pengyu Chen, Yu Shi, Liang Zhang\*, Jun Li, Xun Zhu, Qian Fu, Qiang Liao

Key Laboratory of Low-grade Energy Utilization Technologies and Systems, Ministry of Education,

Chongqing 400030, China

Institute of Engineering Thermophysics, School of Energy and Power Engineering, Chongqing

University, Chongqing 400030, China

\*Corresponding author. Tel.: +86-23-65103102; fax: +86-23-65102474; E-mail  
address: liangzhang@cqu.edu.cn (Liang Zhang).

### *1 Comparison of electrodes before and after carbonization*

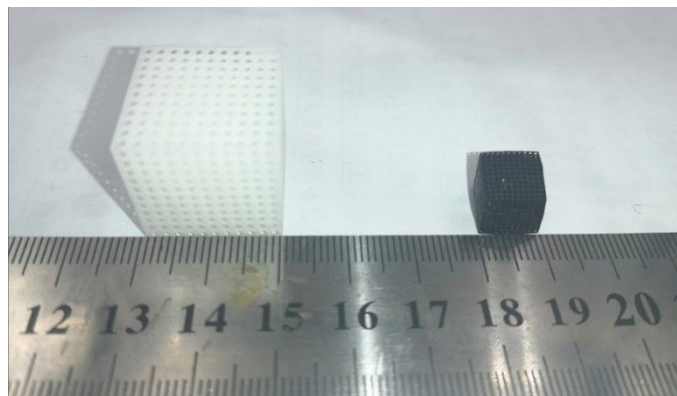

**Figure S1.** Comparison of electrodes before and after carbonization

As shown in Figure S1, the porous UV-curable resin models size reduced by 50% after carbonization

### *2 Schematic of thermally regenerative ammonia-based battery (TRAB)*

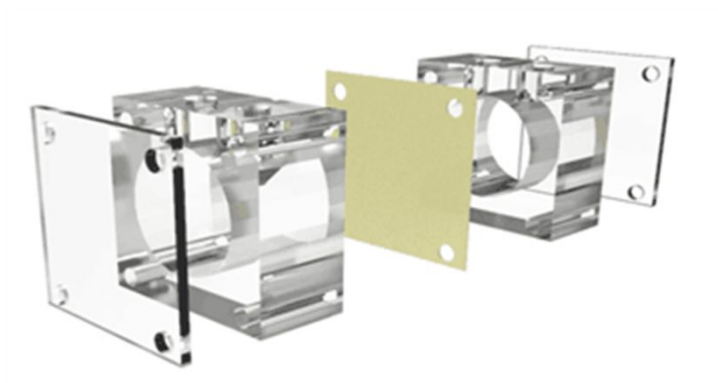

**Figure S2.** Schematic of TRAB reactor in this study

As shown in Figure S2, the battery chamber is a cylindrical chamber with a bottom diameter of 3 cm and a height of 2 cm. The two chambers are separated by an anion exchange membrane.

### 3 Equivalent circuit for cell impedance analysis

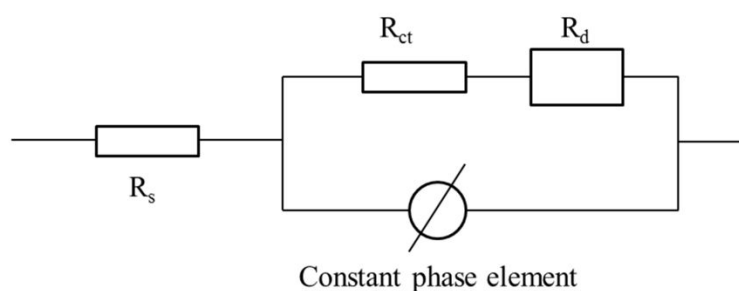

**Figure S3.** Equivalent circuit for cell impedance analysis.

Equivalent circuit for cell impedance analysis is shown in Figure S3. The electrolyte concentration is 0.1 mol/L  $\text{CuSO}_4 \cdot 5\text{H}_2\text{O}$ , 2.5 mol/L  $(\text{NH}_4)_2\text{SO}_4$  and 1 mol / L  $\text{NH}_4\text{OH}$ . The reaction resistance was the sum of charge transfer resistance ( $R_{ct}$ ), and diffusion resistance ( $R_d$ ).

### 4 The maximum power density with different pore size (based on electrode mass)

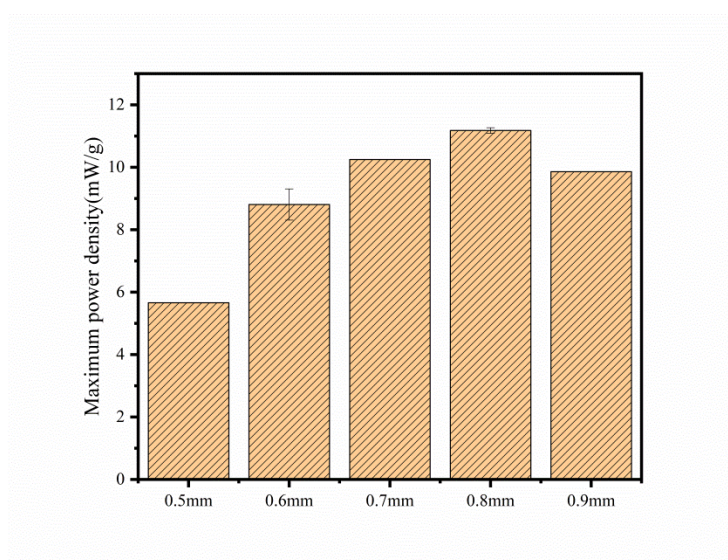

**Figure S4.** The maximum power density with different pore size (based on electrode mass)

TRAB-0.8 has the highest power density based on the electrode mass because of its smaller electrode mass.

##### 5. The EIS results of TRAB-Cu and TRAB-Cu/C

Table S1 Resistance components of TRAB-Cu and TRAB-Cu/C

| Electrode | $R_{ohm} (\Omega)$ | $R_{ct} (\Omega)$ | $R_d(\Omega)$ |
|-----------|--------------------|-------------------|---------------|
| TRAB-Cu   | 2.16               | 0.37              | 0.63          |
| TRAB-Cu/C | 2.40               | 0.23              | 0.43          |

The EIS results of TRAB-Cu and TRAB-Cu/C is shown in Table S1. The  $R_{ohm}$  is the ohmic resistance, which comprises the electrolyte and electrode resistance; and  $R_{ct}$  represents the charge-transfer resistance and  $R_d$  is linked to the diffusion resistance. The reaction internal resistance (the sum of charge transfer resistance and diffusion resistance) of Cu/C electrode is 0.66  $\Omega$  which is lower than that of the copper foam electrode (1  $\Omega$ ).

##### 6. The resistance components of TRAB with different electrodes

Table S2 Resistance components of TRAB with different electrodes

| Pore size | $R_{ohm}(\Omega)$ | $R_{ct} (\Omega)$ | $R_d(\Omega)$ | Total( $\Omega$ ) | surface<br>area( $cm^2$ ) |
|-----------|-------------------|-------------------|---------------|-------------------|---------------------------|
| 0.5mm     | 2.68              | 0.29              | 0.89          | 3.86              | 37.04                     |
| 0.6mm     | 2.40              | 0.23              | 0.43          | 3.06              | 32.20                     |
| 0.7mm     | 2.32              | 0.39              | 0.38          | 3.09              | 27.69                     |

|       |      |      |      |      |       |
|-------|------|------|------|------|-------|
| 0.8mm | 2.36 | 0.41 | 0.40 | 3.17 | 24.07 |
| 0.9mm | 2.57 | 0.48 | 0.40 | 3.45 | 21.57 |

The EIS results and surface area of different electrodes is shown in Table S2.

The surface area of the electrode decreases with the increase of the pore size.

TRAB-0.6 had the smallest internal resistance and obtained the highest performance.
